# Supplementary material
Source: publisher site journal article supplement (https://www.dovepress.com/article/338186)
Supplement: Supplementary file 1 [file get_supplementary_file.php]

**Appendix A**

Notations:

I: Set of emergency call locations (X coordinate, Y coordinate)

N: Set of vehicle base stations

NNA: {M+N+1,….., M+N+Q} Set of non-ambulatory vehicle (Police vans, Taxi’s) base stations

V: Set of vehicles

Set of public vehicles

: Set of private EMS vehicles

: Set of non-ambulatory vehicles

: Set of public vehicles transporting a non-critical patient and in transit to a hospital

: Set of all vehicles transporting either critical patient or two patients or single patient in case of private and non-ambulatory vehicle and in transit to a hospital

Hk: {hk, ….., Hk} Set of hospital nodes on the basis of emergency type k

k = {1,….K} Emergency type

C: Set of critical emergency

NC: Set of non-critical emergency

D: Capacity of EMS vehicle (integer)

j’: New emergency call location in the set I to which vehicle is rerouted at the final step

Parameters:

: Travel time for vehicle v to traverse the arc (i, j) if departed at time τ

: Average service time by vehicle v (obtained using random forest algorithm)

*f*: Threshold time up to which rerouting is allowed

M: A very large number

Decision hoss:

Xijv =

Yijv =

Zijv =
